# Supplementary material for: Fire and Herbivory as Architects of Mediterranean Biodiversity
Source: Research Square preprint supplement (doi:10.21203/rs.3.rs-6163168/v1), 2025-03-14
Supplement: Supplementary file 1 [file 258ddd650595b2c537518ced.pdf]

# Fire and Herbivory as Architects of Mediterranean Biodiversity

## - Supplementary materials -

Marion Lestienne<sup>1,2\*</sup>, Pauline Saurat<sup>1</sup>, Gwendal Mouden<sup>1</sup>, Andy Hennebelle<sup>1,2</sup>, Lisa Bajolle<sup>1</sup>,  
Bérangère Leys<sup>1,2</sup>

<sup>1</sup> IMBE, Aix Marseille Université, Avignon Université, CNRS, IRD, Aix-en-Provence, France

<sup>2</sup> AMAP, University of Montpellier, CIRAD, CNRS, INRAE, IRD, Montpellier, France

\*Corresponding author. Email: [marion.lestienne@lilo.org](mailto:marion.lestienne@lilo.org)

**Abstract:** This research breaks new ground by showing that, contrary to generally accepted key role of fire in shaping plant communities, herbivores shaped both landscape heterogeneity and fire-prone habitats in the Mediterranean area. The interconnected roles of fire and herbivores predisposed habitat resilience, highlighting the need to integrate grazing for fire risk mitigation and biodiversity conservation. The recent decline in pastoralism coincides with the expansion of highly flammable vegetation, exacerbating fire risks under current climate conditions. These insights advocate for conservation strategies that balance fire management and sustainable herbivory to preserve Mediterranean biodiversity in the face of increasing anthropogenic and climatic pressures.

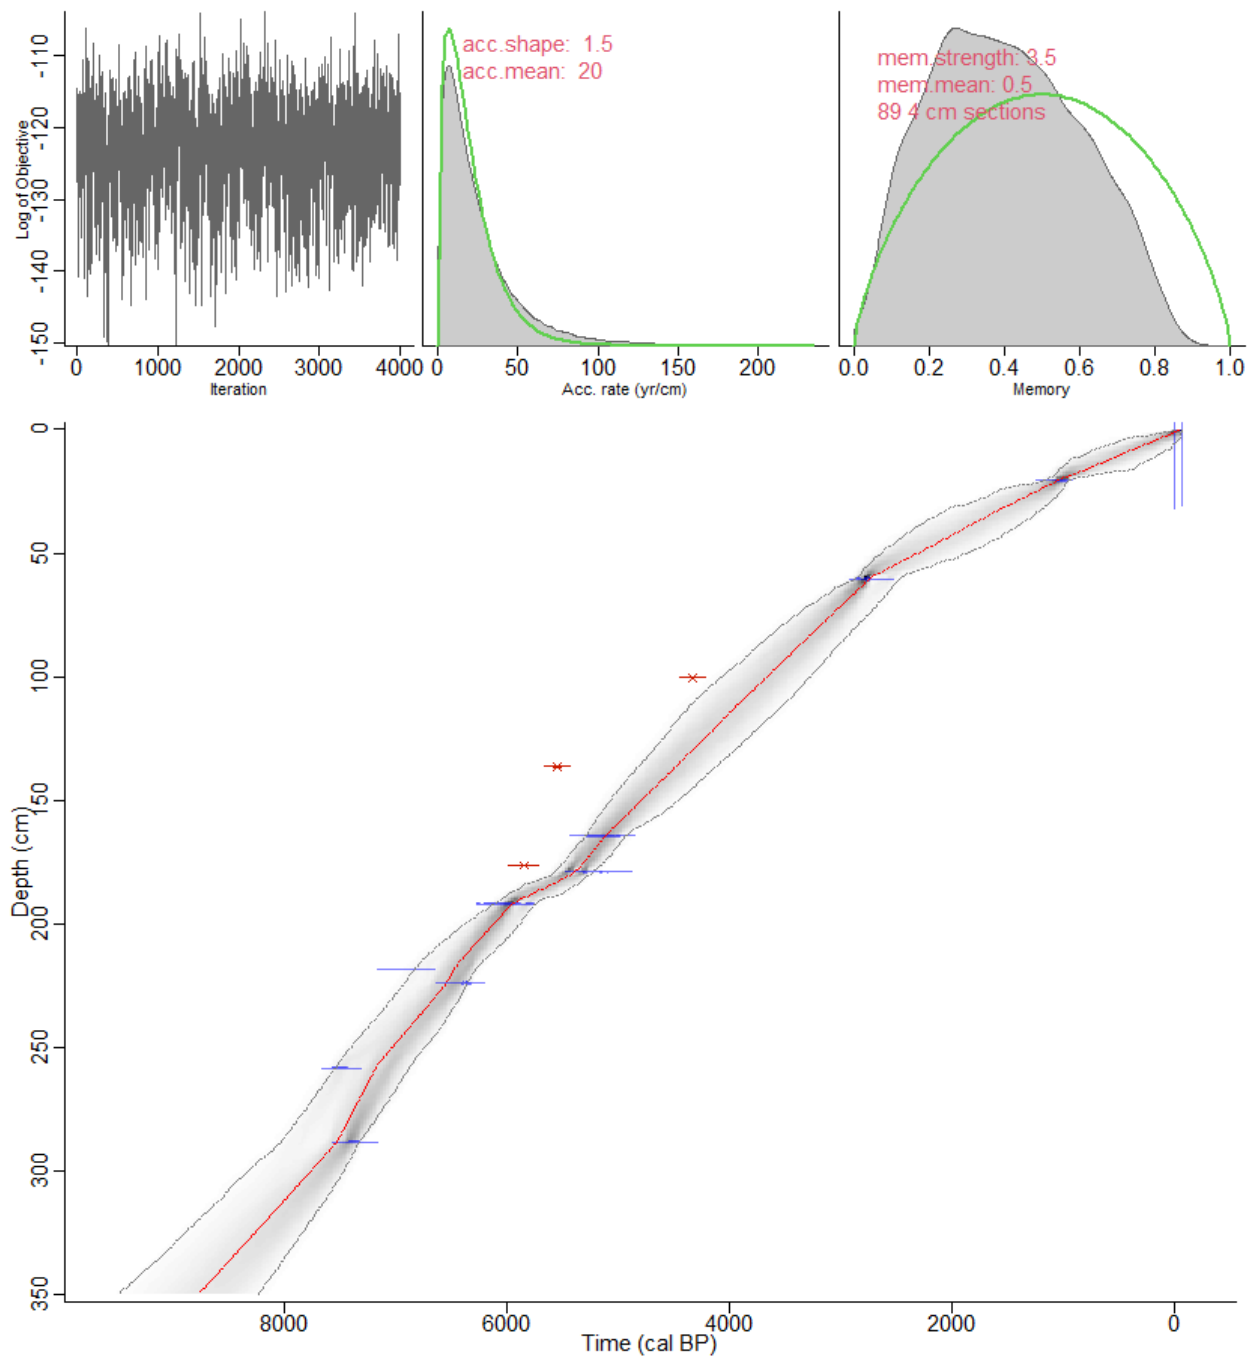

**Fig. S1.**

Age-depth model of etang des Aulnes computed with 'rbacon' and based on 9 AMS radiocarbon dates; red dots correspond to  $^{14}\text{C}$  dates not taken into account in the age-depth model. The shaded area corresponds to the 95% confidence interval, and the dotted red curve represents the mean model.

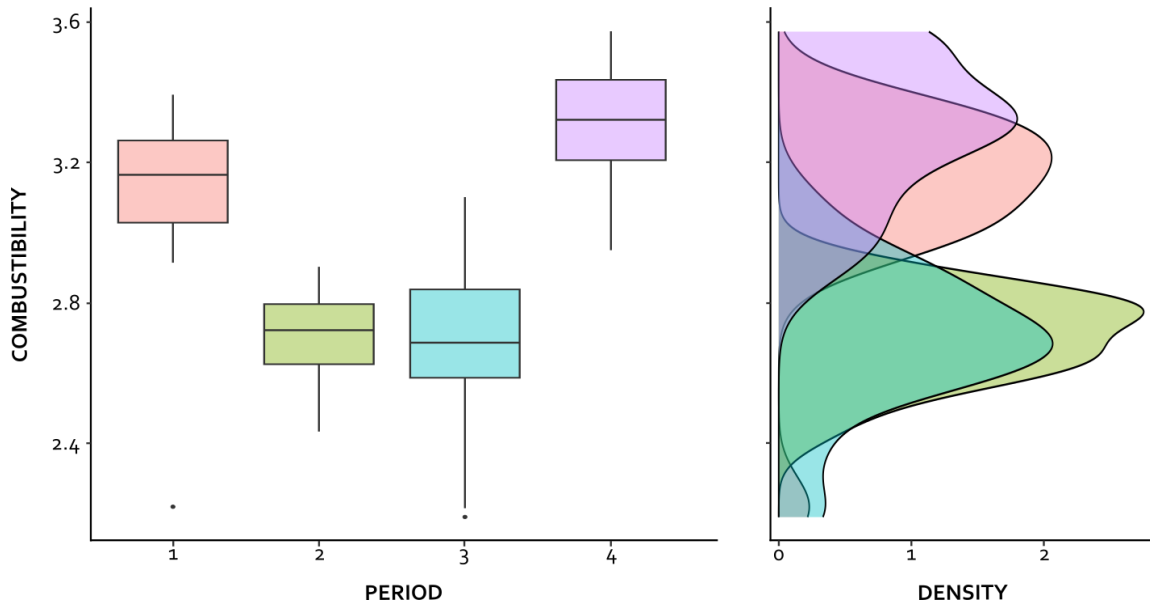

**Fig. S2.**

Mean combustibility and distribution across periods. The mean combustibility per sample was calculated as a weighted average, using the formula:

$$\text{Mean combustibility} = \frac{\sum(\text{influx}(i) * \text{combustibility}(i))}{\text{total influx}}$$

where  $i$  corresponds to the habitat type. Significant differences between periods were determined using a non-parametric Mann-Whitney U test. Periods 1 and 2, 1 and 3, 2 and 4, 3 and 4 are significantly different (respectively: p-value =  $1.754e^{-08}$ ; p-value =  $1.004e^{-08}$ ; p-value =  $1.281e^{-06}$ ; p-value =  $1.677e^{-06}$ ). Periods 1 and 4, 2 and 3 are not significantly different (respectively: p-value = 0.1036; p-value = 0.9324).

**Table S1.**

Accelerator mass spectrometry radiocarbon dating of macroremains and of bulk sediments. The median depth is use for the depth-age model. Three dates were not used to make the age model (in red) because they correspond to unreliable bulk sediment dates.

5

| Sample ID  | Material     | Lab. No.   | Age              | Methods | Age cal. BP. ( $2\sigma$ ) |
|------------|--------------|------------|------------------|---------|----------------------------|
| 2A-1B-101  | macroremains | Poz-164674 | 6020 $\pm$ 40 BP | AMS     | 5980-6060                  |
| 2B-1B-35.5 | macroremains | Poz-165279 | 4475 $\pm$ 35 BP | AMS     | 4440-4510                  |
| 2B-1B-50   | macroremains | Poz-165280 | 4550 $\pm$ 35 BP | AMS     | 4515-4585                  |
| 2B-1B-63   | macroremains | Poz-164675 | 5230 $\pm$ 40 BP | AMS     | 5190-5270                  |
| 2B-1B-95   | macroremains | Poz-164676 | 5600 $\pm$ 40 BP | AMS     | 5560-5640                  |
| 2A-1A-20   | bulk         | Poz-171849 | 1115 $\pm$ 30 BP | AMS     | 1080-1150                  |
| 2A-1A-60   | bulk         | Poz-171850 | 2645 $\pm$ 30 BP | AMS     | 2610-2680                  |
| 2A-1A-100  | bulk         | Poz-171851 | 4330 $\pm$ 35 BP | AMS     | 4295-4365                  |
| 2A-1B-136  | bulk         | Poz-171852 | 5545 $\pm$ 35 BP | AMS     | 5510-5580                  |
| 2A-1B-176  | bulk         | Poz-171854 | 5850 $\pm$ 40 BP | AMS     | 5810-5890                  |
| 2B-1B-258  | bulk         | Poz-171855 | 6590 $\pm$ 40 BP | AMS     | 6550-6630                  |
| 2B-1B-288  | bulk         | Poz-171856 | 6450 $\pm$ 40 BP | AMS     | 6410-6490                  |

**Table S2.**

Combustibility classes, pollen percentages, and associated taxa for Mediterranean habitats, providing insights into vegetation dynamics and fire behavior. Pollen taxa contributing less than 1% of the total pollen record are written in grey. A total of 72.48% of the identified pollen has been attributed to a Trabaud habitat, classified by combustibility (1: Very Low to 5: Very High) based on vegetation flammability and fire spread potential. Total pollen percentages represent each habitat's abundance over the entire sequence, while maximum percentages highlight peak dominance in specific levels. Key habitats include Beech Forest (e.g., *Fagus*), White Oak Coppice (e.g., *Quercus pubescens*), Green Oak Coppice (e.g., *Quercus ilex*), Pine Forest (e.g., *Pinus*), Garrigue/Heathland (e.g., *Thymus*, *Calluna*), and Grassland (Poaceae, Fabaceae). An "Other" category encompasses 27.52% of the pollen, representing diverse taxa not tied to a Trabaud habitat, including riparian or floodplain vegetation (e.g., *Alnus*, *Abies*, *Ulmus*), which fall outside the habitats defined by Trabaud (17).

| Habitat              | Combustibility | % total | % max | Associated pollen                                                                                                                                                                                                                                                                                                                                                                                                                                                                                                                                                                                                                                                                                                                                                                                                                                                                                                                                                                                                                                                                                                                                                                                                                                                                                                                                                                                                                                                                                                                                                                                                                                                                                                                                                                                                                                                      |
|----------------------|----------------|---------|-------|------------------------------------------------------------------------------------------------------------------------------------------------------------------------------------------------------------------------------------------------------------------------------------------------------------------------------------------------------------------------------------------------------------------------------------------------------------------------------------------------------------------------------------------------------------------------------------------------------------------------------------------------------------------------------------------------------------------------------------------------------------------------------------------------------------------------------------------------------------------------------------------------------------------------------------------------------------------------------------------------------------------------------------------------------------------------------------------------------------------------------------------------------------------------------------------------------------------------------------------------------------------------------------------------------------------------------------------------------------------------------------------------------------------------------------------------------------------------------------------------------------------------------------------------------------------------------------------------------------------------------------------------------------------------------------------------------------------------------------------------------------------------------------------------------------------------------------------------------------------------|
| Beech forest         | 1              | 2.48    | 8.92  | <i>Fagus</i> (FAGACEAE)                                                                                                                                                                                                                                                                                                                                                                                                                                                                                                                                                                                                                                                                                                                                                                                                                                                                                                                                                                                                                                                                                                                                                                                                                                                                                                                                                                                                                                                                                                                                                                                                                                                                                                                                                                                                                                                |
| White oak coppice    | 1              | 23.28   | 28.57 | Acer (SAPINDACEAE)<br>Corylus (BETULACEAE)<br>Mercurialis-type (EUPHORBIACEAE)<br>Pistacia (ANACARDIACEAE)<br><i>Quercus pubescens/robur-type</i> (FAGACEAE)<br>CUPRESSACEAE<br>Erica-type (ERICACEAE)<br>Hedera (ARALACEAE)<br>Lonicera-type (CAPRIFOLIACEAE)<br>Phillyrea (OLEACEAE)<br>Quercus coccinea-type (FAGACEAE)<br><i>Quercus ilex/coccinea-type</i> (FAGACEAE)<br>ROSACEAE<br>Stachys-type (LAMIACEAE)<br><i>Pinus</i> (PINACEAE)                                                                                                                                                                                                                                                                                                                                                                                                                                                                                                                                                                                                                                                                                                                                                                                                                                                                                                                                                                                                                                                                                                                                                                                                                                                                                                                                                                                                                          |
| Green oak coppice    | 2              | 4.75    | 1.51  | CUPRESSACEAE<br>CYPERACEAE<br>Calluna-type (ERICACEAE)<br>EUPHORBIACEAE<br>LAMIACEAE<br>LILIACEAE<br>Olea (OLEACEAE)<br><i>Plantago coronopus-type</i> (PLANTAGINACEAE)<br><i>Plantago tenuiflora-type</i> (PLANTAGINACEAE)<br><i>Plantago-type</i> (PLANTAGINACEAE)<br>RANUNCULACEAE<br>Thymus-type (LAMIACEAE)<br>APIACEAE<br>CONVOLVULACEAE<br>Cerealia-type (POACEAE)<br>FABACEAE<br>Medicago-type (FABACEAE)<br>Mentha-type (LAMIACEAE)<br>Quercus-type (FAGACEAE)<br>POACEAE<br>Polygonum (POLYGONACEAE)<br>Sanguisorba minor-type (ROSACEAE)<br>Triticum-type (POACEAE)                                                                                                                                                                                                                                                                                                                                                                                                                                                                                                                                                                                                                                                                                                                                                                                                                                                                                                                                                                                                                                                                                                                                                                                                                                                                                         |
| Pine forest          | 3              | 9.99    | 3.36  | <i>Abies</i> (PINACEAE)<br>Adiantum (POLYPODIACEAE)<br><i>Alnus</i> (BETULACEAE)<br>Ambrosia/Xanthium-type (ASTERACEAE)<br>Asteraceae-type (ASTERACEAE)<br><i>Artemisia</i> (ASTERACEAE)<br>Aruncus (ROSACEAE)<br>Asteroides (ASTERACEAE)<br>BRASSICACEAE<br><i>Betula</i> (BETULACEAE)<br>Bis (BOYACEAE)<br>CHENOPODIACEAE<br>Cannabis (CANNABACEAE)<br>Carpinus/Ostrya-type (BETULACEAE)<br>Cedrus (PINACEAE)<br>Celtis (CANNABACEAE)<br>Centauria (ASTERACEAE)<br>Ceraulium-type (CARYOPHYLLACEAE)<br>Cichorioides (ASTERACEAE)<br>Cirsium-type (ASTERACEAE)<br>Cistus (CISTACEAE)<br>Cotinus (ANACARDIACEAE)<br>DIPSACACEAE<br>Draba-type (BRASSICACEAE)<br>Ephedra fragilis-type (EPHEDRACEAE)<br>Fraxinus (OLEACEAE)<br>GENTIANACEAE<br>Gagea-type (LILIACEAE)<br>Galium (RUBIACEAE)<br>Geranium (GERANIACEAE)<br>Helianthemum (CISTACEAE)<br>Herniaria, Paronychia, Illecestrum-type (CARYOPHYLLACEAE)<br>Hottentia (PRIMULACEAE)<br>Hypericum (HYPERICACEAE)<br>Juglans (JUGLANDACEAE)<br>Legum-type (ERICACEAE)<br>Ligustrum (OLEACEAE)<br>Linum (LINACEAE)<br>Lythrum (MYTHRACEAE)<br>MALVACEAE<br>Myrica (MYRICACEAE)<br>Odonites (OROBANCHACEAE)<br>Ornithogalum-type (LILIACEAE)<br>Paronychia-type (CARYOPHYLLACEAE)<br>Picea (PINACEAE)<br>Pimpinella-type (APIACEAE)<br>Platanus (PLATANACEAE)<br>Polycnemum-type (AMARANTHACEAE)<br>Populus (SALICACEAE)<br>Potentilla (ROSACEAE)<br>Ranunculus-type (RANUNCULACEAE)<br>Rhamnus (RHAMNACEAE)<br>Rhus (ANACARDIACEAE)<br>Ribes-type (GROSSULACEAE)<br>Rumex (POLYGONACEAE)<br>SCROPHULARIACEAE<br>Salix (SALICACEAE)<br>Sammol-gp (APIACEAE)<br>Scabiosa-type (CAPRIFOLIACEAE)<br>Silene-type (CARYOPHYLLACEAE)<br>Taxus (TAXACEAE)<br>Thalictrum (RANUNCULACEAE)<br>Tilia (MALVACEAE)<br>Trifolium-type (FABACEAE)<br>URTICACEAE<br>Ulmus (ULMACEAE)<br>Veronica (PLANTAGINACEAE)<br>Vitis (VITACEAE) |
| Garrigue / Heathland | 4              | 15.99   | 23.38 |                                                                                                                                                                                                                                                                                                                                                                                                                                                                                                                                                                                                                                                                                                                                                                                                                                                                                                                                                                                                                                                                                                                                                                                                                                                                                                                                                                                                                                                                                                                                                                                                                                                                                                                                                                                                                                                                        |
| Grassssland          | 5              | 14.98   | 22.59 |                                                                                                                                                                                                                                                                                                                                                                                                                                                                                                                                                                                                                                                                                                                                                                                                                                                                                                                                                                                                                                                                                                                                                                                                                                                                                                                                                                                                                                                                                                                                                                                                                                                                                                                                                                                                                                                                        |
| Other                | /              | 28.52   | 30.48 |                                                                                                                                                                                                                                                                                                                                                                                                                                                                                                                                                                                                                                                                                                                                                                                                                                                                                                                                                                                                                                                                                                                                                                                                                                                                                                                                                                                                                                                                                                                                                                                                                                                                                                                                                                                                                                                                        |

**Table S3.**

List of coprophilous fungal spore taxa used in the analysis. Taxa highlighted in gray are those not commonly referenced in the scientific literature as indicators of herbivory or pastoralism. In contrast, well-documented taxa, such as *Sporormiella*, *Podospora*, *Sordaria*, *Ascobolus*, and *Ascodesmis*, are recognized as reliable indicators of herbivore presence or grazing activity. These spores alone do not allow for a clear distinction between wild and domestic herbivores. Our interpretations are supported by a bibliographic review and comparisons with existing literature to contextualize the results (63).

| Taxa                                  | Max count | Reference(s)         |
|---------------------------------------|-----------|----------------------|
| <i>Sporormiella</i> -type             | 20        | (3, 14, 64–66)       |
| <i>Podospora</i> -type                | 8         | (65, 67–70)          |
| <i>Sordaria</i> -type                 | 5         | (65, 67–69, 71, 72)  |
| <i>Ascobolus</i> -type                | 3         | (65, 67–69, 73, 74)  |
| <i>Ascodesmis</i> -type               | 3         | (67–69, 75, 76)      |
| <i>Coniochaeta</i> -type              | 14        | (65, 66, 77)         |
| <i>Apiosordaria/Cercophora</i> -type  | 5         | (65, 66, 72, 78, 79) |
| <i>Chaetomium</i> -type               | 3         | (65, 66, 78)         |
| <i>Arnium</i> -type                   | 2         | (65, 80, 81)         |
| Xylariales-type                       | 3         | (3, 65, 66, 78)      |
| <i>Delitschia</i> -type               | 2         | (3, 65, 82)          |
| <i>Neurospora/Gelasinospora</i> -type | 2         | (65, 66, 82)         |
